# Supplementary material for: Development and pilot evaluation of a structured curriculum for surgical handover
Source: Research Square preprint supplement (doi:10.21203/rs.3.rs-6777652/v1), 2025-06-24
Supplement: Supplementary file [file 5d29763c588e77871ec37cad.pdf]

## Intern teaching attendee feedback - Tallaght

### 1. Please indicate your agreement with each of the following statements

|                                                  | Strongly disagree     | Disagree              | Neither agree nor disagree | Agree                 | Strongly agree        |
|--------------------------------------------------|-----------------------|-----------------------|----------------------------|-----------------------|-----------------------|
| This class gave an effective review of handovers | <input type="radio"/> | <input type="radio"/> | <input type="radio"/>      | <input type="radio"/> | <input type="radio"/> |
| This class was useful to clinical practice       | <input type="radio"/> | <input type="radio"/> | <input type="radio"/>      | <input type="radio"/> | <input type="radio"/> |
| I would recommend this class to others           | <input type="radio"/> | <input type="radio"/> | <input type="radio"/>      | <input type="radio"/> | <input type="radio"/> |

### 2. Please indicate how helpful you found each of the following class elements

|                                                                           | Not at all helpful    | Slightly helpful      | Somewhat helpful      | Very helpful          | Extremely helpful     |
|---------------------------------------------------------------------------|-----------------------|-----------------------|-----------------------|-----------------------|-----------------------|
| Didactic teaching (slides)                                                | <input type="radio"/> | <input type="radio"/> | <input type="radio"/> | <input type="radio"/> | <input type="radio"/> |
| Video examples of good and bad handover with discussion                   | <input type="radio"/> | <input type="radio"/> | <input type="radio"/> | <input type="radio"/> | <input type="radio"/> |
| Simulated handover practice in groups                                     | <input type="radio"/> | <input type="radio"/> | <input type="radio"/> | <input type="radio"/> | <input type="radio"/> |
| Peer feedback (receiving feedback on your performance from other interns) | <input type="radio"/> | <input type="radio"/> | <input type="radio"/> | <input type="radio"/> | <input type="radio"/> |

### 3. Will your handover practice/technique change after attending this class?

- ☐ Yes
- ☐ No
- ☐ I don't know

### 4. Is there anything you would change about this class?

### 5. Anything else you would like to add?
