# Supplementary material for: Development and pilot evaluation of a structured curriculum for surgical handover
Source: Research Square preprint supplement (doi:10.21203/rs.3.rs-6777652/v1), 2025-06-24

# Part one

How comfortable would you be giving patient handover to another intern?

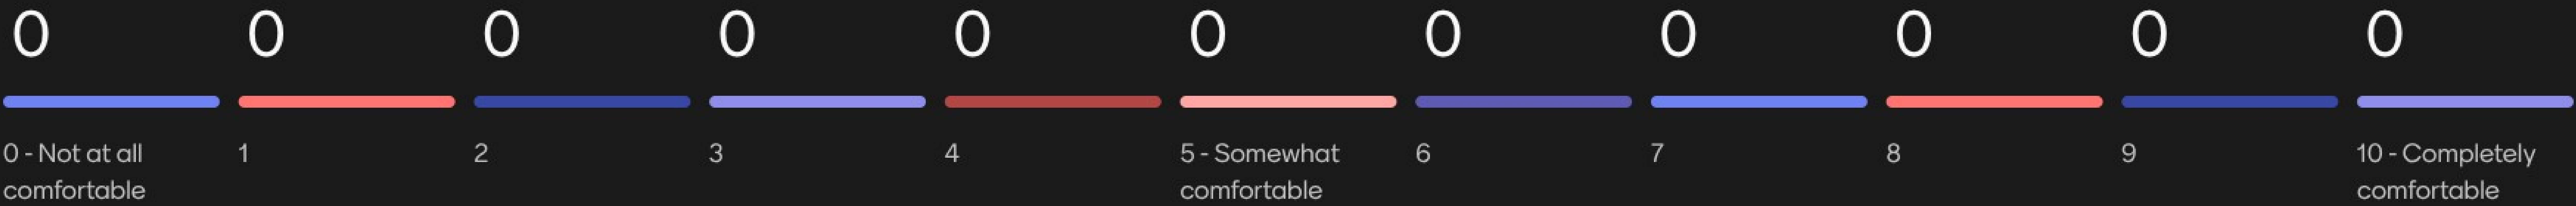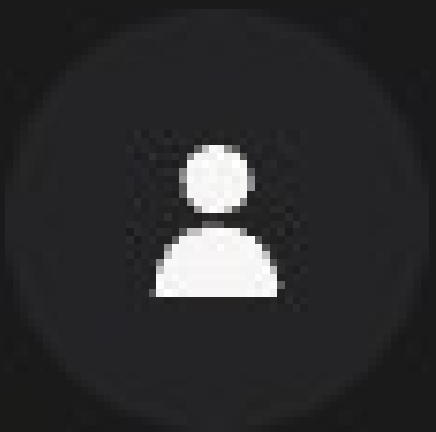

How comfortable would you be giving patient handover to a senior colleague?

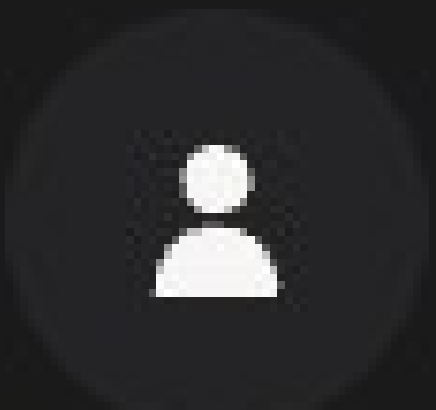

How comfortable would you be posing necessary clarifying questions during team handover?



How comfortable would you be providing a summary to your team at the end of a handover meeting?



# Part two

How comfortable would you be giving patient handover to another intern?





How comfortable would you be giving patient handover to a senior colleague?





How comfortable would you be posing necessary clarifying questions during team handover?



How comfortable would you be providing a summary to your team at the end of a handover meeting?



Supplement: Supplementary file [file 20b554f8ae544e9061406f62.pdf]
